# Supplementary material for: The impact of controlled physical activity on the immune and endocrine system in breast cancer patients after adjuvant chemotherapy
Source: Research Square preprint supplement (doi:10.21203/rs.3.rs-6520065/v1), 2025-05-07
Supplement: Supplementary file 1 [file f918e2dcb83a54193c97b089.docx]

The impact of controlled physical activity on the immune and endocrine system in breast cancer patients after adjuvant chemotherapy

Journal: Supportive Care in Cancer

Lenka Gescheidtova*1,2,, Lucie Kusova3,4, Jana Gottwaldova1,5, Pavlina Bazalova6, Zdenka Cermakova1, Kristina Greplova1,5, Iva Hrncirikova6,7, Lucia Bohovicova7, Pavlina Bazalova6, Katerina Kapounkova6, Dagmar Adamkova7,8, Marketa Palacova7, Katarina Petrakova7,8, Igor Kiss7,8, Jana Halamkova7,8

1. Department of Laboratory Medicine, Masaryk Memorial Cancer Institute, Brno, Czech Republic
2. Department of Biochemistry, Faculty of Medicine, Masaryk University, Brno, Czech Republic
3. Institute of Biostatistics and Analyses, Faculty of Medicine, Masaryk University
4. Institute of Health Information and Statistics of the Czech Republic, Prague, Czech Republic
5. Bank of Biological Material, Masaryk Memorial Cancer Institute, Brno, Czech Republic
6. Department of Physical Activities and Health Sciences, Faculty of Sports Studies, Masaryk University, Brno, Czech Republic
7. Department of Comprehensive Cancer Care, Masaryk Memorial Cancer Institute, Czech Republic
8. Department of Comprehensive Cancer Care, Faculty of Medicine, Masaryk University, Brno, Czech Republic

*corresponding author

# Corresponding author

Lenka Gescheidtova, Masaryk Memorial Cancer Institute, Zluty kopec 7, 656 53 Brno, Czech republic, +420 543 136 720, [lenka.gescheidtova@mou.cz](mailto:lenka.gescheidtova@mou.cz)

| Reason | SAPA (n = 56) | BCC (n = 60) |
| --- | --- | --- |
| health complication related to treatment (nausea, strong adverse reactions to the radiotherapy) | 4 | 2 |
| health issues unrelated to treatment (preexisting diseases of musculoskeletal system, joint pain or others) | 3 | 2 |
| time constraints due to caregiving responsibilities | 3 | 0 |
| technical difficulties with online connection or HR monitoring | 4 | 0 |
| unspecified reason | 4 | 5 |
| lack of response to follow-up | 3 | 2 |
| change in treatment strategy rendering the patient ineligible for the study | 1 | 2 |
| decling the study immediately after chemotherapy (refusing to initiate exercise) | 12 | 0 |
| Early termination total | **22** | **13** |
| Dropout total | **34** | **13** |
| Completed | 22 | 47 |

**Supplementary table 1** The reasons for early termination of participation in the study (n=116). The total dropout includes all reasons for early termination and also a substantial number of patients who declined immediately after chemotherapy once they found out they were being randomized to the SAPA group.

Abb. BCC – breast carcinoma control group; SAPA – supervised aerobic physical activity

|  | Univariate | | | Multivariate | | |
| --- | --- | --- | --- | --- | --- | --- |
| Parameter  Median (IQR) |  | **OR (95%CI)** | **p-value** |  | **OR (95%CI)** | **p-value** |
| Baseline (T0) | | | | | | |
| Age | 0.094 | 1.10  (1.02–1.18) | **0.014** | – | – | – |
| BMI | 0.100 | 0.91  (0.75–1.11) | 0.353 | – | – | – |
| TSH | 0.318 | 1.16  (0.62–2.15) | 0.649 | -0.087 | 0.92  (0.46–1.83) | 0.806 |
| IL-6 | -0.135 | 0.87  (0.61–1.26) | 0.472 | -0.250 | 0.78  (0.51–1.19) | 0.251 |
| IL-8 | 0.095 | 1.10  (0.96–1.26) | 0.162 | 0.088 | 1.09  (0.95–1.25) | 0.202 |
| 25OH-vitD | 0.002 | 1.00  (0.97–1.04) | 0.919 | -0.001 | 1.00  (0.96–1.04) | 0.954 |
| IGF-1 | -0.004 | 1.00  (0.98–1.01) | 0.642 | 0.010 | 1.01  (0.99–1.03) | 0.324 |
| CCL2 | -0.014 | 0.99  (0.90–1.08) | 0.762 | -0.058 | 0.94  (0.84–1.06) | 0.339 |
| CCL4 | 0.036 | 1.04  (0.93–1.16) | 0.526 | -0.016 | 0.98(  0.87–1.12) | 0.807 |
| CD4/CD8 | -0.439 | 0.65  (0.27–1.56) | 0.331 | -0.764 | 0.47  (0.18–1.20) | 0.113 |
| NLR | 0.194 | 1.21  (0.70–2.09) | 0.485 | 0.313 | 1.37  (0.72–2.59) | 0.338 |
| Post-CT(T1) | | | | | | |
| TSH | 0.113 | 1.12  (0.43–2.94) | 0.819 | -0.160 | 0.85  (0.28–2.63) | 0.781 |
| IL-6 | 0.061 | 1.06  (0.84–1.35) | 0.612 | -0.157 | 0.86  (0.60–1.22) | 0.384 |
| IL-8 | 0.065 | 1.07  (0.78–1.45) | 0.678 | -0.092 | 0.91  (0.62–1.34) | 0.636 |
| 25OH-vitD3 | 0.018 | 1.02  (0.98–1.06) | 0.418 | -0.008 | 0.99  (0.94–1.05) | 0.762 |
| IGF-1 | -0.003 | 1.00  (0.99–1.01) | 0.569 | 0.005 | 1.01  (0.99–1.02) | 0.422 |
| CCL2 | 0.061 | 1.06  (0.98–1.16) | 0.161 | 0.027 | 1.03  (0.93–1.13) | 0.581 |
| CCL4 | 0.021 | 1.02  (0.93–1.12) | 0.675 | -0.023 | 0.98  (0.87–1.10) | 0.709 |
| CD4/CD8 | -0.087 | 0.92  (0.39–2.14) | 0.840 | -0.359 | 0.70  (0.28–1.72) | 0.434 |
| NLR | -0.243 | 0.78  (0.43–1.43) | 0.426 | -0.262 | 0.77  (0.38–1.56) | 0.467 |

**Supplementary table 2** Dropout predictors determined by logistic regression models. The multivariate model is adjusted for age at cancer diagnosis.

Abb. 25OH-vit D – 25-hydroxylated form of serum cholecalciferol and ergocalciferol; CCL2 - chemokine (C-C motif) ligand 2; CCL4 - chemokine (C-C motif) ligand 4; CD4/CD8 - CD4+ T-cells / CD8+ T-cells ratio; CI – confidence interval; IGF-1 – insulin-like growth factor 1; IL-6 – interleukin 6; IL-8 – interleukin 8; NLR – neutrophil-to-lymphocyte ratio; OR – odds ratio; TSH – thyroid-stimulating hormone
